# Supplementary material for: Variability in X-ray induced effects in [Rh(COD)Cl]2 with changing experimental parameters
Source: Royal Society of Chemistry journal article supplement (doi:10.1039/d2cp03928a), 2022-01-01
Supplement: d2cp03928a1.pdf [file d2cp03928a1.pdf]

## Supplementary Information

### Variability in X-ray induced effects in $[\text{Rh}(\text{COD})\text{Cl}]_2$ with changing experimental parameters

Nathalie K. Fernando,<sup>a\*</sup> Hanna Boström,<sup>b</sup> Claire A. Murray,<sup>c</sup> Robin L. Owen,<sup>c</sup> Amber L. Thompson,<sup>d</sup> Joshua L. Dickerson,<sup>e</sup> Elspeth F. Garman,<sup>f</sup> Andrew B. Cairns,<sup>g</sup> and Anna Regoutz<sup>a\*</sup>

<sup>a</sup> *Department of Chemistry, University College London, 20 Gordon Street, London, WC1H 0AJ, UK.*

<sup>b</sup> *Max Planck Institute for Solid State Research, Heisenbergstraße 1, 70569 Stuttgart, Germany.*

<sup>c</sup> *Diamond Light Source Ltd, Diamond House, Harwell Science and Innovation Campus, Didcot, Oxfordshire, OX11 0DE, UK.*

<sup>d</sup> *Chemical Crystallography, Chemistry Research Laboratory, University of Oxford, South Parks Road, Oxford OX1 3QR, UK.*

<sup>e</sup> *MRC Laboratory of Molecular Biology, Francis Crick Avenue, Cambridge Biomedical Campus, Cambridge CB2 0QH, UK.*

<sup>f</sup> *Department of Biochemistry, Dorothy Crowfoot Hodgkin Building, University of Oxford, South Parks Road, Oxford, OX1 3QU, UK.*

<sup>g</sup> *Department of Materials, Imperial College London, Royal School of Mines, Exhibition Road, SW7 2AZ, UK.*

# 1 Estimation of Dose

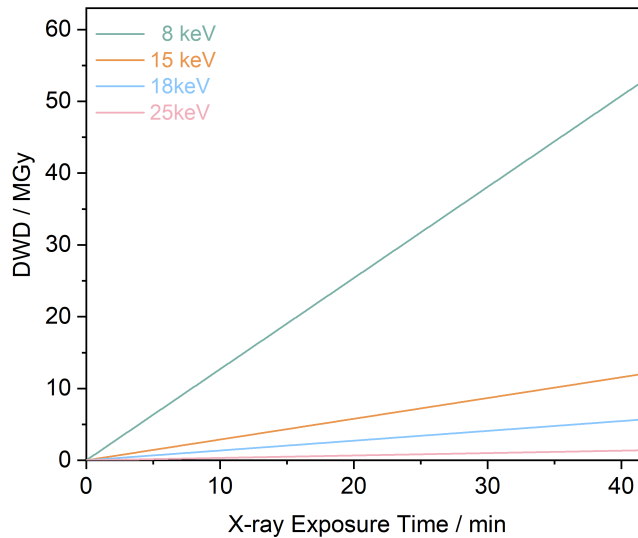

**Figure S1:** The absorbed diffraction-weighted dose (DWD) calculated using RADDOSE-3D, as a function of X-ray exposure time for  $[\text{Rh}(\text{COD})\text{Cl}]_2$ , at photon energies  $h\nu$  of 8, 15, 18, and 25 keV.

**Table S1:** The parameters included in the RADDOSE-3D input file for  $[\text{Rh}(\text{COD})\text{Cl}]_2$  used to estimate the doses for the varying photon energy setups in the powder XRD experiments at beamline I11 at Diamond Light Source, Didcot, UK.

| RADDOSE parameter                        | 8 keV                | 15 keV               | 18 keV               | 25 keV               |
|------------------------------------------|----------------------|----------------------|----------------------|----------------------|
| Crystal type                             | cylinder             | cylinder             | cylinder             | cylinder             |
| Crystal Dimension* / $\mu\text{m}$       | $300 \times 40000$   | $300 \times 40000$   | $300 \times 40000$   | $300 \times 40000$   |
| PixelsPerMicron                          | 0.06                 | 0.06                 | 0.06                 | 0.06                 |
| Container material type                  | mixture              | mixture              | mixture              | mixture              |
| Material mixture                         | pyrex                | pyrex                | pyrex                | pyrex                |
| Container thickness / $\mu\text{m}$      | 10                   | 10                   | 10                   | 10                   |
| Container density / $\text{g cm}^{-3}$   | 2.23                 | 2.23                 | 2.23                 | 2.23                 |
| Beam type                                | Gaussian             | Gaussian             | Gaussian             | Gaussian             |
| Photon flux / $\text{ph s}^{-1}$         | $5.7 \times 10^{12}$ | $2.4 \times 10^{12}$ | $1.4 \times 10^{12}$ | $2.2 \times 10^{11}$ |
| FWHM / $\mu\text{m}^2$                   | $2000 \times 600$    | $2000 \times 600$    | $2000 \times 600$    | $2000 \times 600$    |
| Energy / keV                             | 8                    | 15                   | 18                   | 25                   |
| Collimation type                         | rectangular          | rectangular          | rectangular          | rectangular          |
| Collimation dimensions / $\mu\text{m}^2$ | $2500 \times 800$    | $2500 \times 800$    | $2500 \times 800$    | $2500 \times 800$    |

\* diameter  $\times$  length of capillary

## 2 PXRD Refinements

The small, periodic discontinuities observed in the data, particularly evident in the 8 keV and 15 keV integrated intensity (peak area) plots as a function of time and dose (Figures S3(a) and S3(d)) can be attributed to changes in beam current associated with the top-up mode of the synchrotron storage ring.

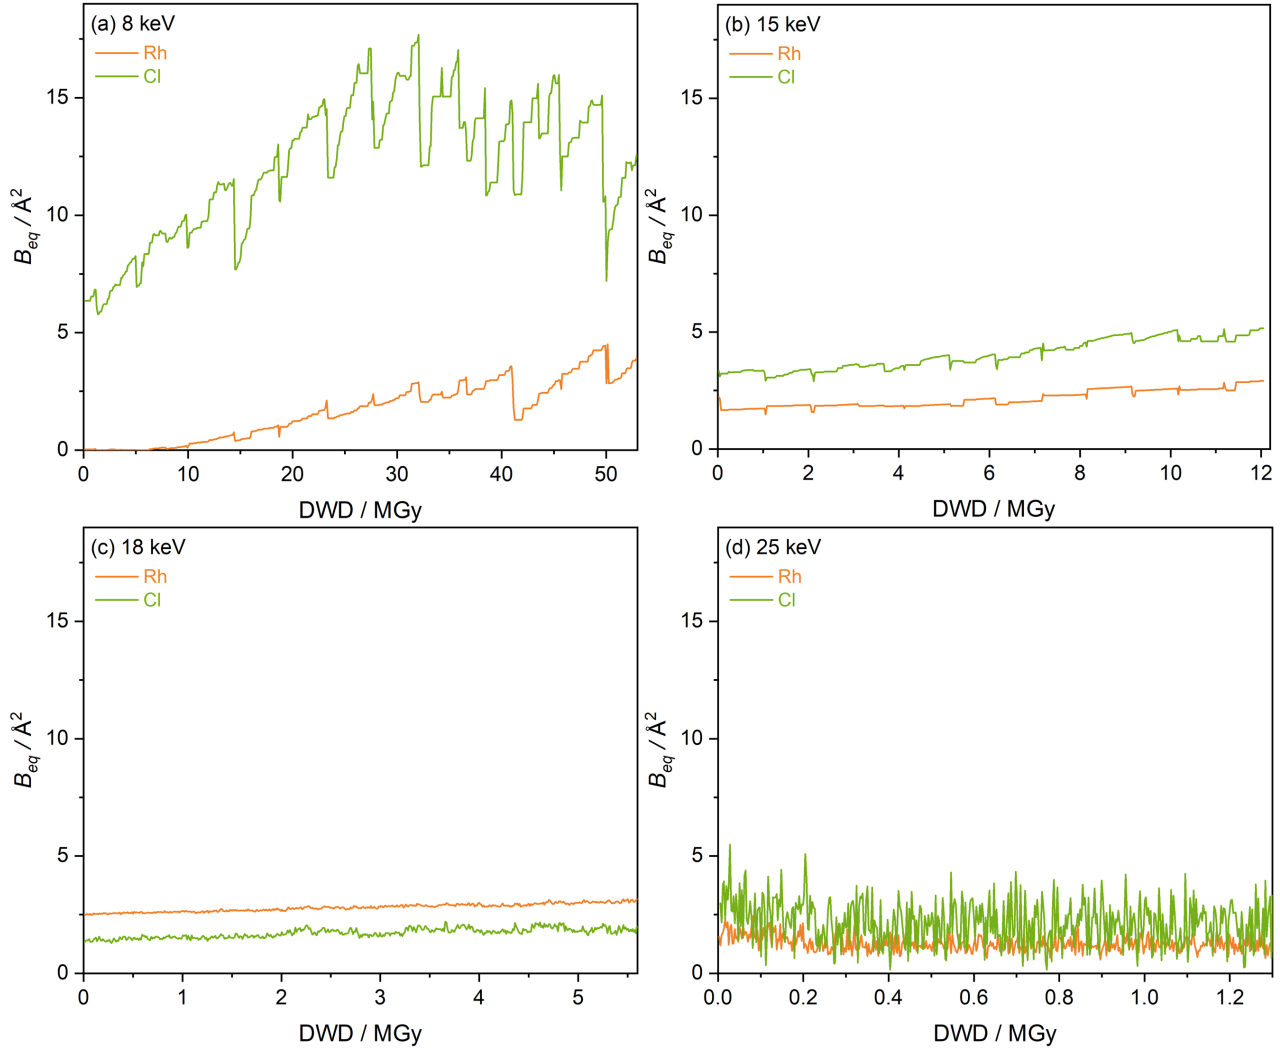

**Figure S2:** The refined values of the isotropic atomic displacement parameter  $B_{eq}$  for Rh and Cl at setups with a photon energy  $h\nu$  of (a) 8 keV, (b) 15 keV, (c) 18 keV and (d) 25 keV as a function of diffraction-weighted dose (DWD). The carbon  $B_{eq}$  values are fixed to a value of 2.0 throughout all 500 datasets.

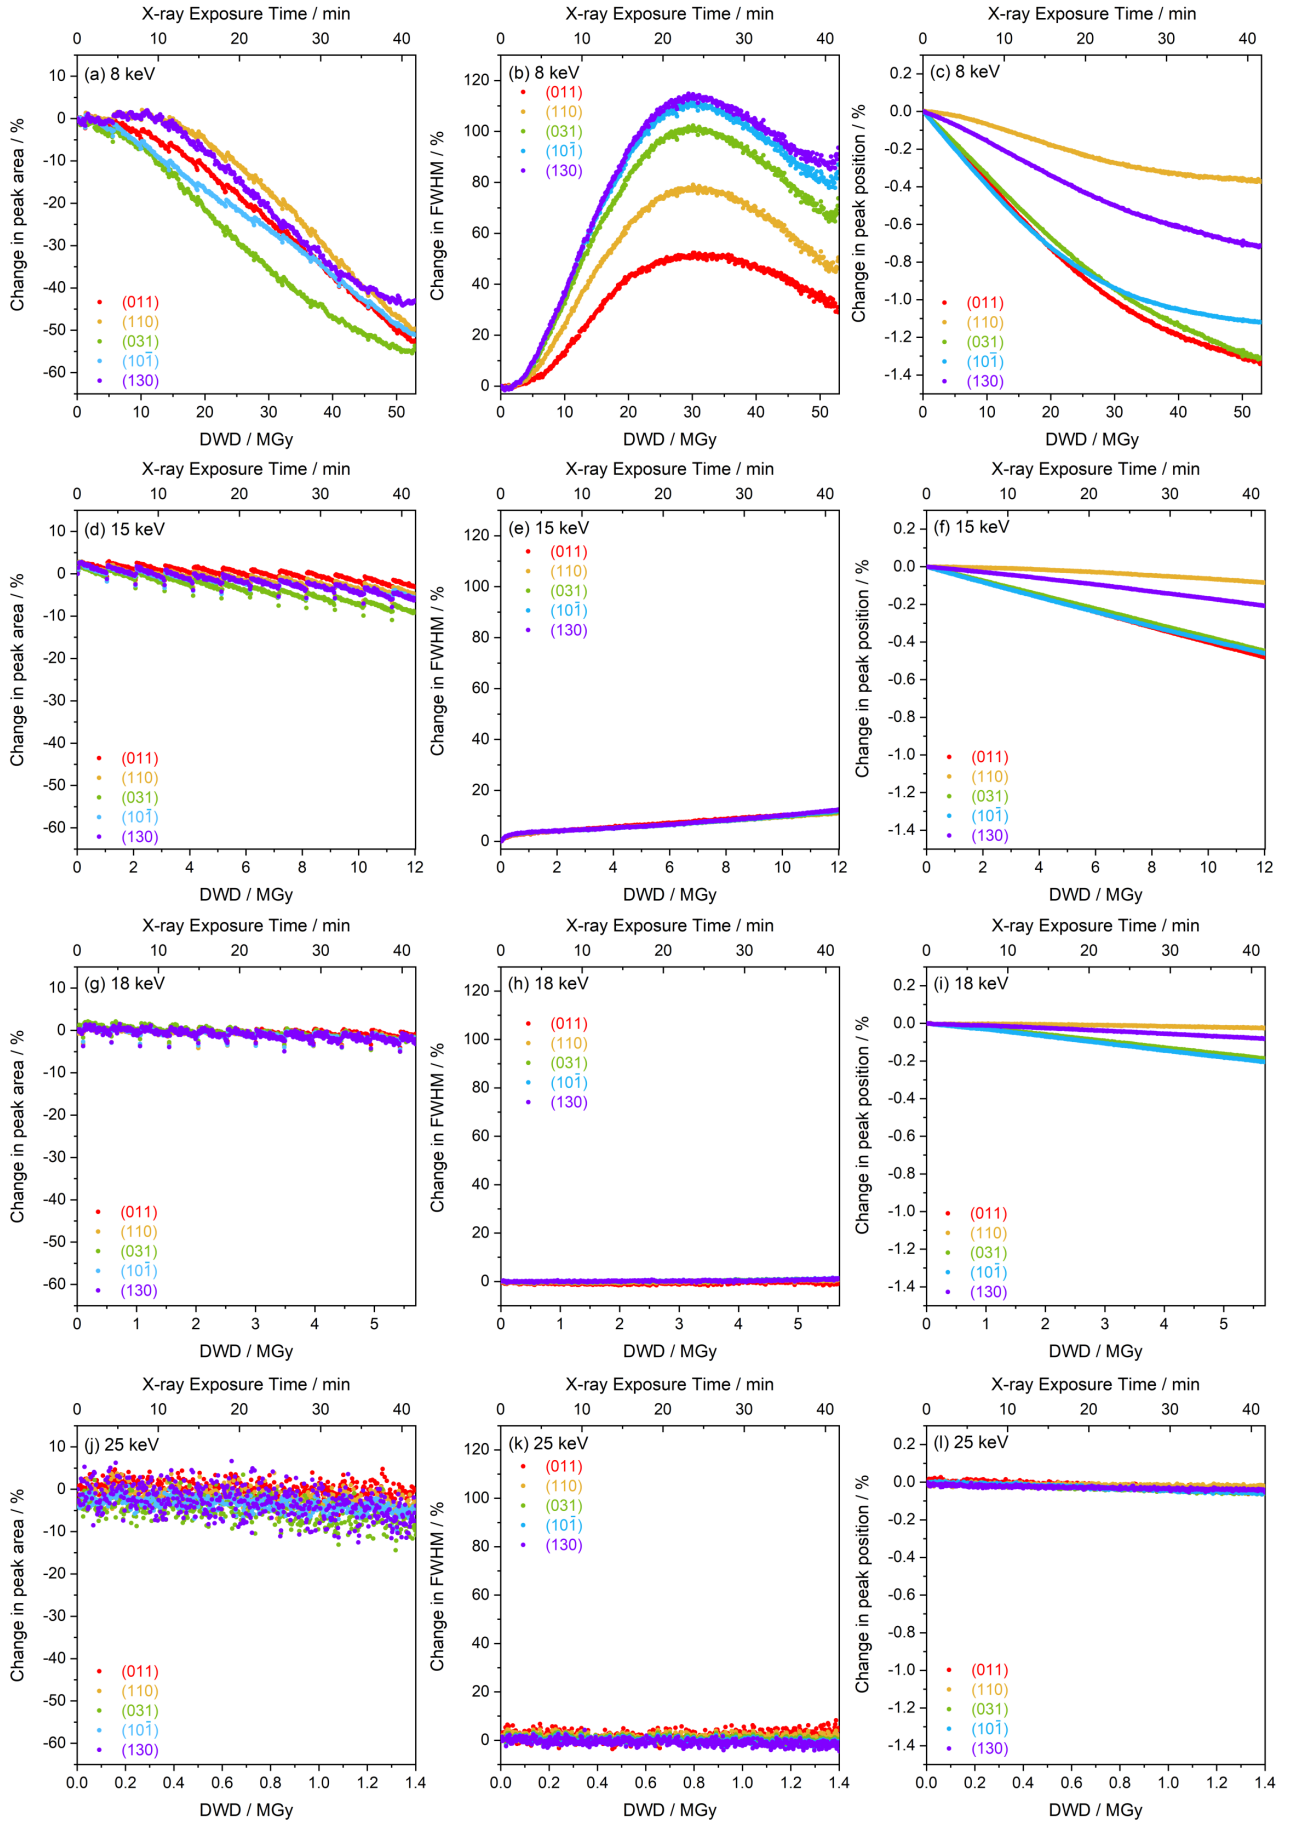

**Figure S3:** The percentage change in peak intensity, FWHM, and peak shift for  $[\text{Rh}(\text{COD})\text{Cl}]_2$  as a function of diffraction-weighted dose (DWD) and X-ray exposure time, obtained from Le Bail refinements, at setups with a photon energy  $h\nu$  of (a) 8 keV, (b) 15 keV, (c) 18 keV and (d) 25 keV.

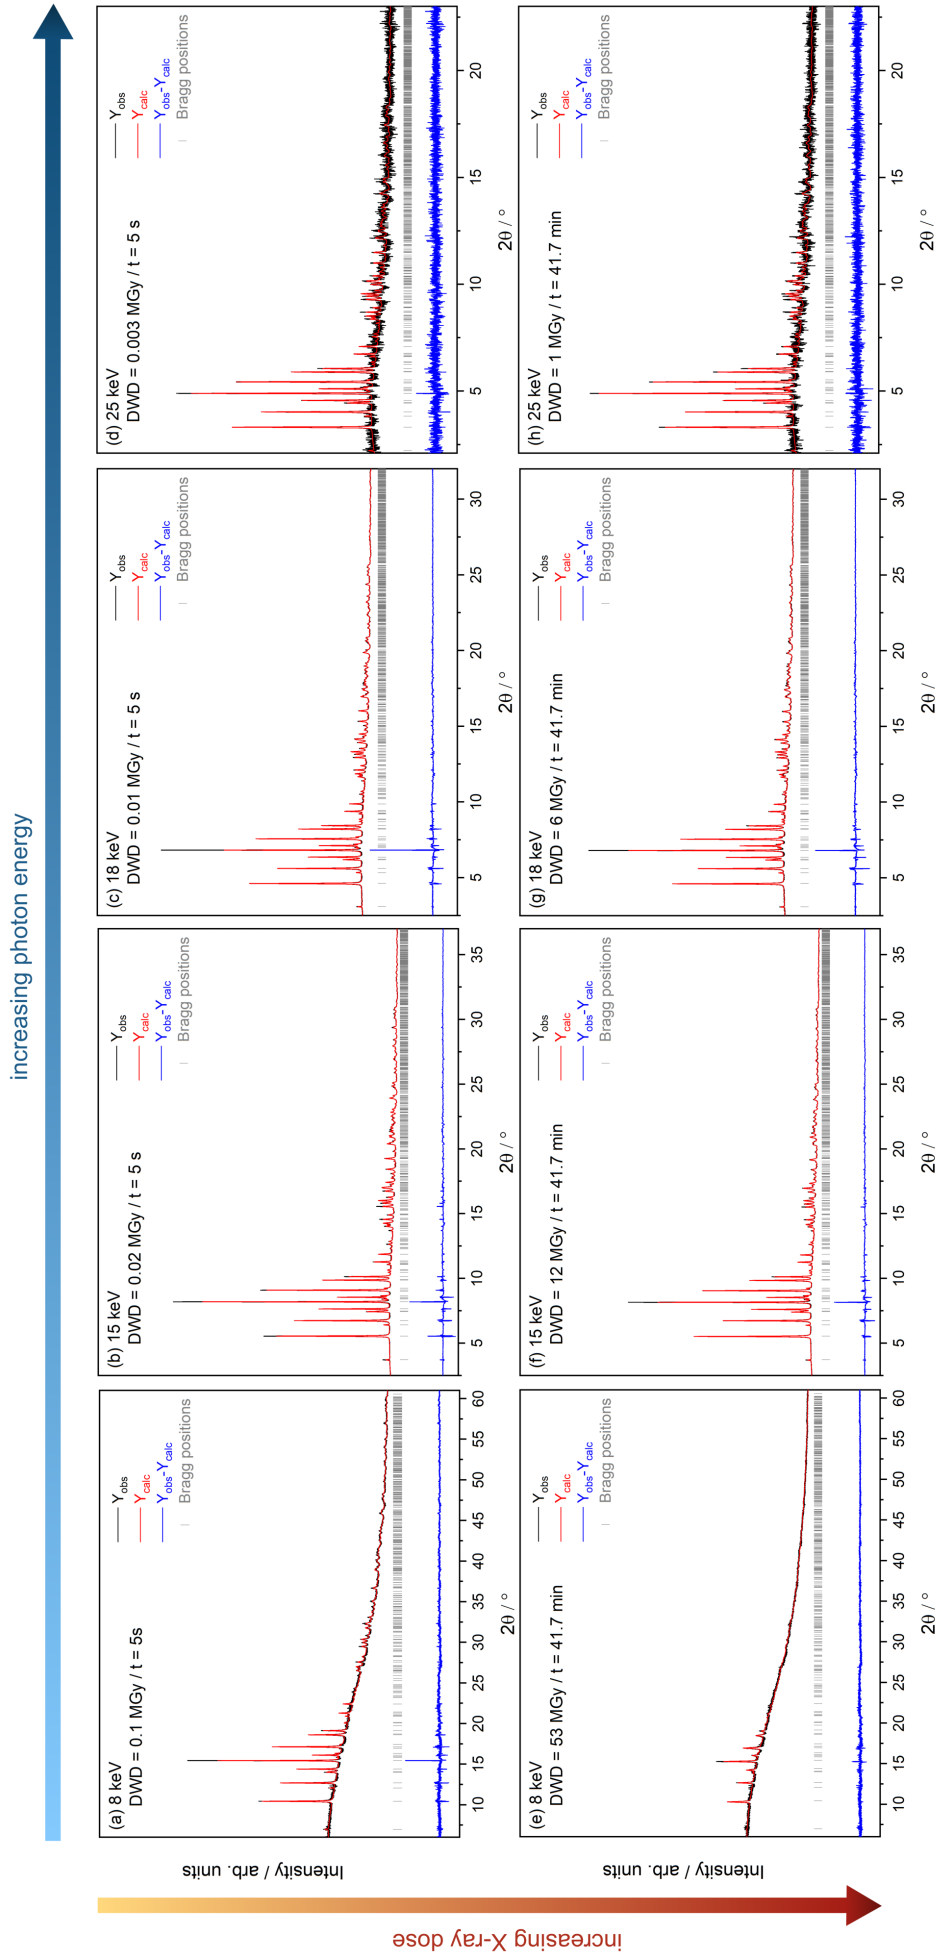

**Figure S4:** The Rietveld refinements of the minimum dose (top row) and maximum dose (bottom row) PXRD patterns of  $[\text{Rh}(\text{COD})\text{Cl}]_2$  at experimental setups with a photon energy  $h\nu$  of (a) and (e) 8 keV, (b) and (f) 15 keV, (c) and (g) 18 keV, and (d) and (h) 25 keV.

### 3 Estimation of PXRD Resolution

In single crystal macromolecular X-ray diffraction, discussion of resolution is routine, particularly in investigations of X-ray damage. However, this is not the case in powder X-ray diffraction studies. Although there is no direct equivalent, in order to bridge the gap between the two techniques, a somewhat crude approximation of PXRD resolution is made here. This was achieved by extracting the average error on the raw intensities,  $\sigma$ , obtained during Rietveld refinements. The diffraction peak at the furthest  $2\theta$  point, which has an intensity above the  $2\sigma$  threshold is considered to be the last resolvable peak,<sup>1</sup> and converted to the  $q$  ‘resolution’ value. Tabulated below are the estimated  $q$  values at each photon energy studied at the start ( $t = 5$  s) and end ( $t = 41.7$  min) of irradiation. It should be noted that due to the organic and monoclinic nature of the complex, individual peaks at high  $2\theta$  values could not be completely resolved. Therefore the errors in the  $d$ -spacing are defined by the half-width of these broad peaks, which takes into account the  $2\theta$  distribution of underlying peaks.

**Table S2:** Estimation of the ‘resolution’ of the diffraction experiments carried out in this work extracted from our X-ray diffraction data. The peak at the furthest  $2\theta$  point is shown for each start and end diffraction pattern at the four energies studied, which has an intensity above the  $2\sigma$  threshold, i.e. the last resolvable peak. This is tabulated with the associated Miller indices  $hkl$ ,  $d$ -spacing,  $d$ , the error on  $d$ , resolution,  $q$  with its propagated error  $\Delta q$  and the percentage change in  $q$  from the minimum dose (start) to maximum dose (end) structure.

| $h\nu$ / keV        | $2\theta$ / ° | $h\ k\ l$      | $d$ / Å | $\Delta d$ | $q$ / Å <sup>-1</sup> | $\Delta q$ | change in $q$ / % |
|---------------------|---------------|----------------|---------|------------|-----------------------|------------|-------------------|
| 8 <sub>start</sub>  | 60.1          | 1 15 2         | 1.55    | 0.01       | 4.06                  | 0.03       | -61.8             |
| 8 <sub>end</sub>    | 22.1          | 0 3 2          | 4.04    | 0.04       | 1.56                  | 0.02       |                   |
| 15 <sub>start</sub> | 48.1          | 7 6 0          | 1.014   | 0.004      | 6.20                  | 0.02       | -19.5             |
| 15 <sub>end</sub>   | 38.3          | 2 13 $\bar{5}$ | 1.26    | 0.01       | 4.98                  | 0.05       |                   |
| 18 <sub>start</sub> | 35.5          | 6 7 $\bar{2}$  | 1.126   | 0.004      | 5.58                  | 0.02       | -7.0              |
| 18 <sub>end</sub>   | 33.0          | 6 2 0          | 1.211   | 0.007      | 5.19                  | 0.03       |                   |
| 25 <sub>start</sub> | 14.9          | 2 3 4          | 1.91    | 0.04       | 3.29                  | 0.08       | -4.5              |
| 25 <sub>end</sub>   | 14.2          | 1 11 $\bar{2}$ | 2.00    | 0.02       | 3.14                  | 0.04       |                   |

### References

- [1] V. R. Dubach and A. Guskov, *Crystals*, 2020, **10**, 580.
